# Supplementary material for: Nitrite oxidizing bacteria (NOB) dominating in nitrifying community in full-scale biological nutrient removal wastewater treatment plants
Source: PubMed Central journal article supplement (PMC5256632; doi:10.1186/s13568-017-0328-y), 2017-01-23
Supplement: 13568_2017_328_MOESM1_ESM.pdf [file 13568_2017_328_MOESM1_ESM.pdf]

1 **Supplementary Figures for**

2  
3 **Nitrite oxidizing bacteria (NOB) dominating in nitrifying community in full-scale biological nutrient removal**  
4 **wastewater treatment plants**

5  
6 *AMB Express*

7  
8 Qian Yao<sup>1,2</sup>, Dang-Cong Peng<sup>1,2</sup>

9  
10 <sup>1</sup>School of Environmental and Municipal Engineering, Xi'an University of Architecture and Technology, Xi'an, 710055,  
11 China;

12 <sup>2</sup>Key Laboratory of Northwest Water Resource Environment and Ecology, Ministry of Education, Xi'an, 710055, China.

13  
14 **Correspondence:** Qian Yao, School of Environmental and Municipal Engineering, Xi'an University of Architecture and  
15 Technology, Xi'an, 710055, China

16 E-mail: qianyao@hotmail.com

19

*Dengjiacun: W1*

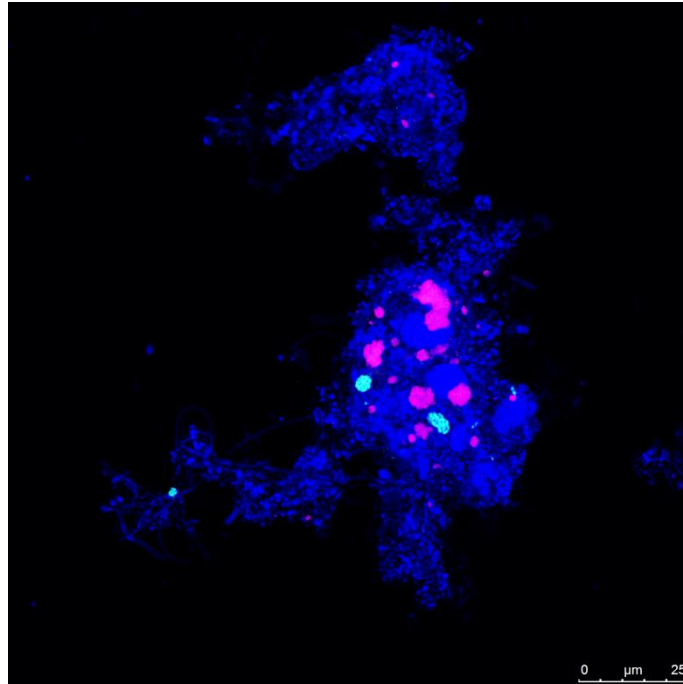

20

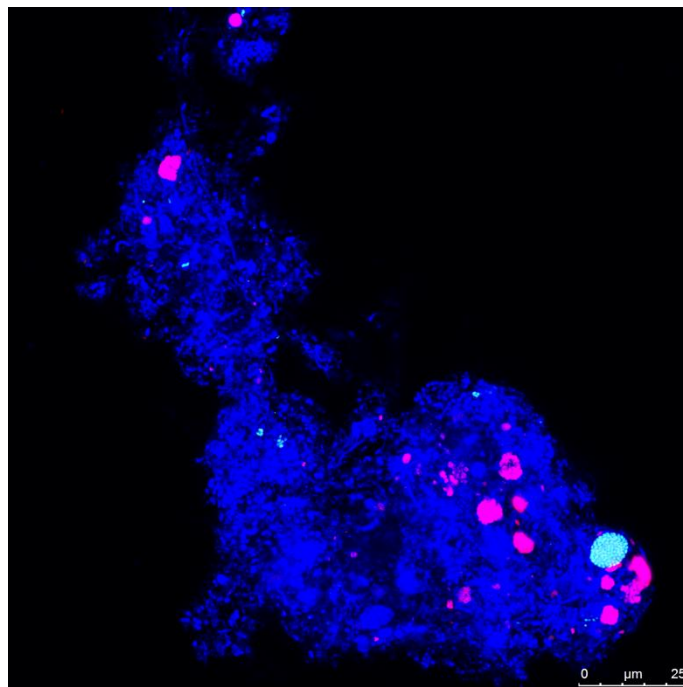

21

22

*Dengcun: W2*

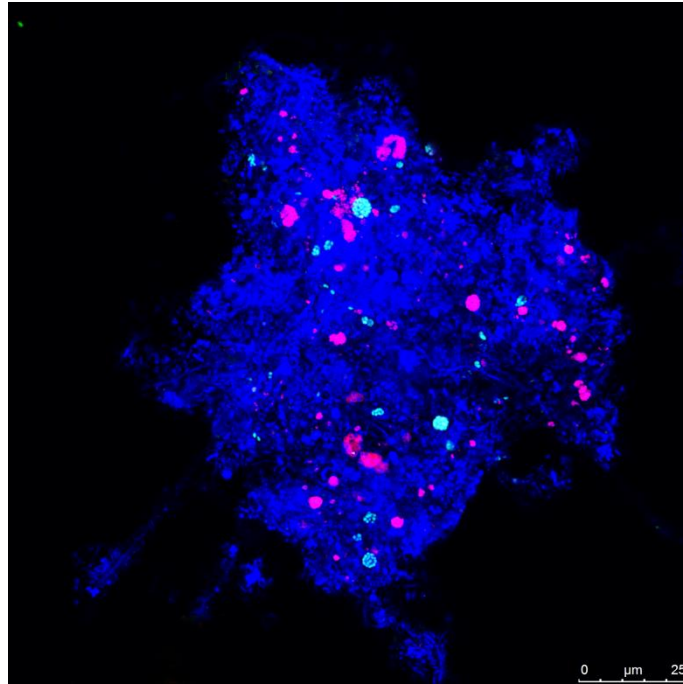

23

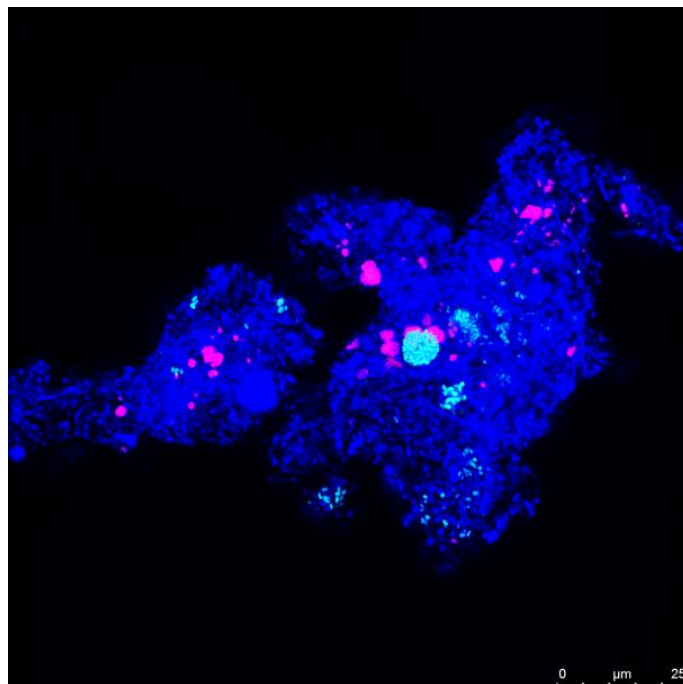

24

25

*Beishiqiao: W3*

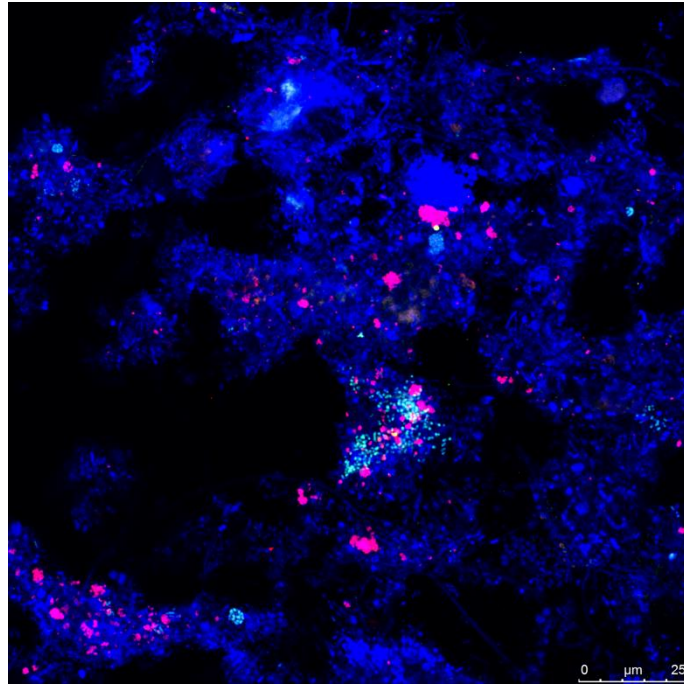

26

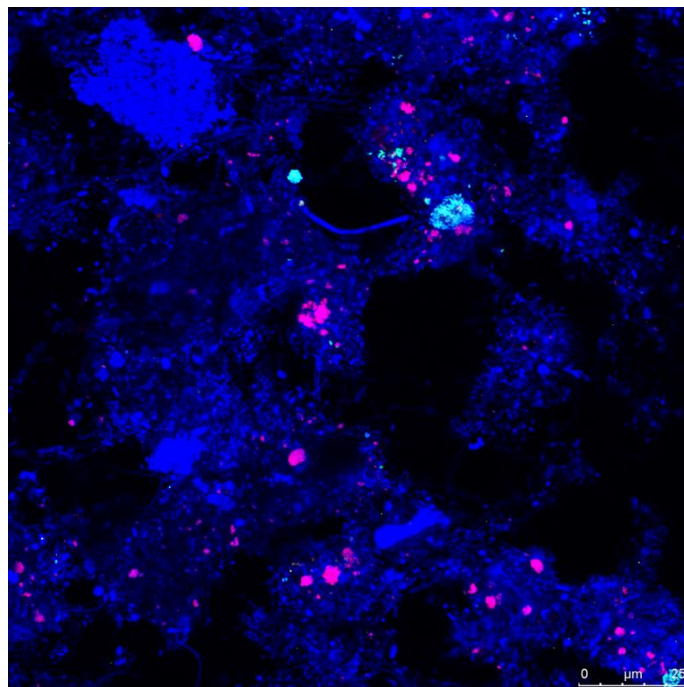

27

28

*Bshiq: W4*

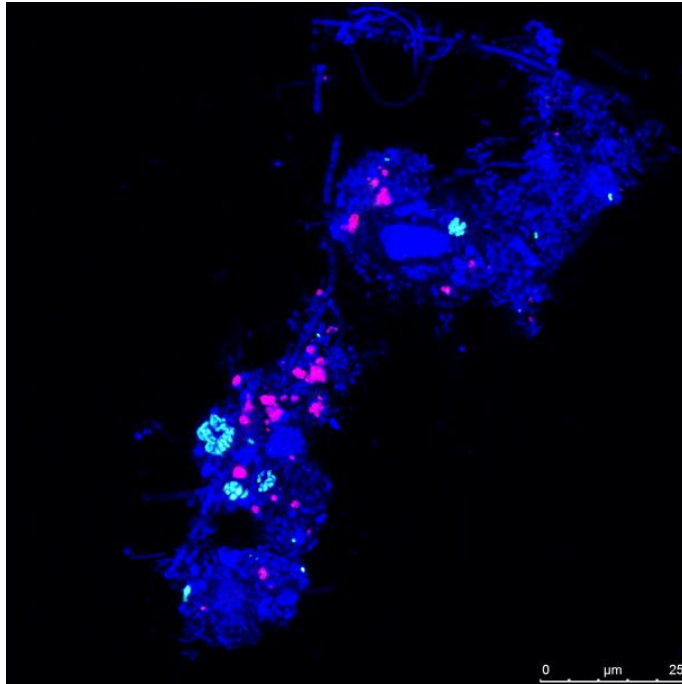

29

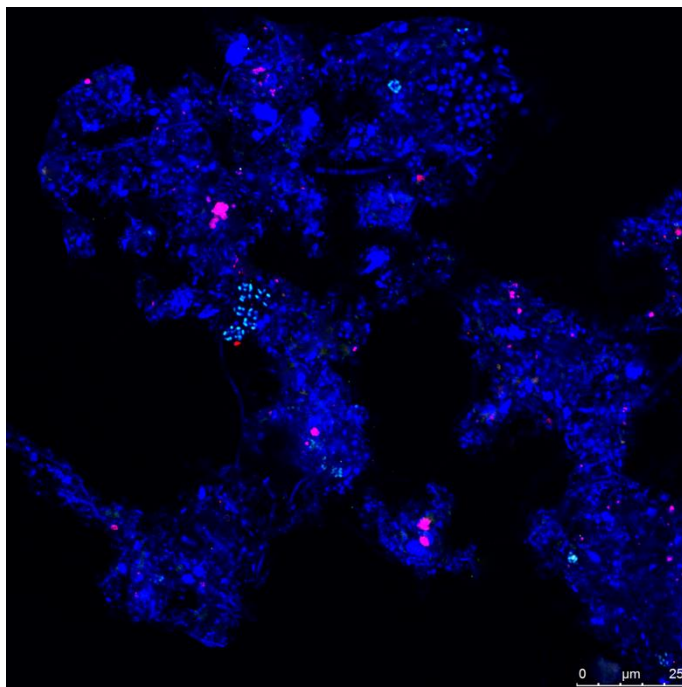

30

31

*Fangzhicheng: W5*

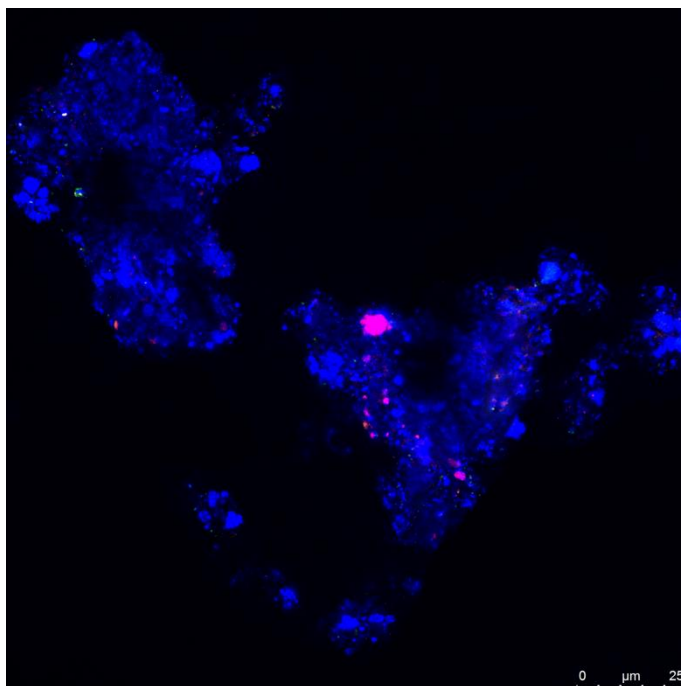

32

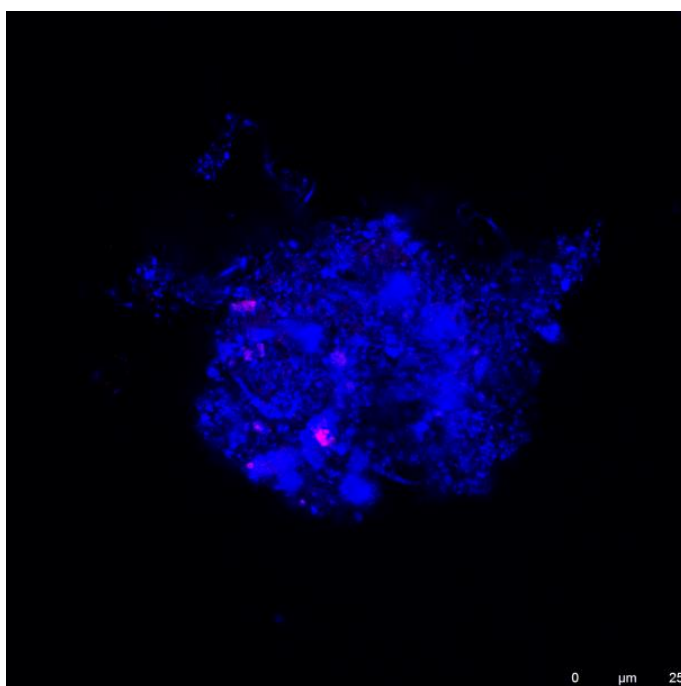

33

34

*Dianzicun: W6*

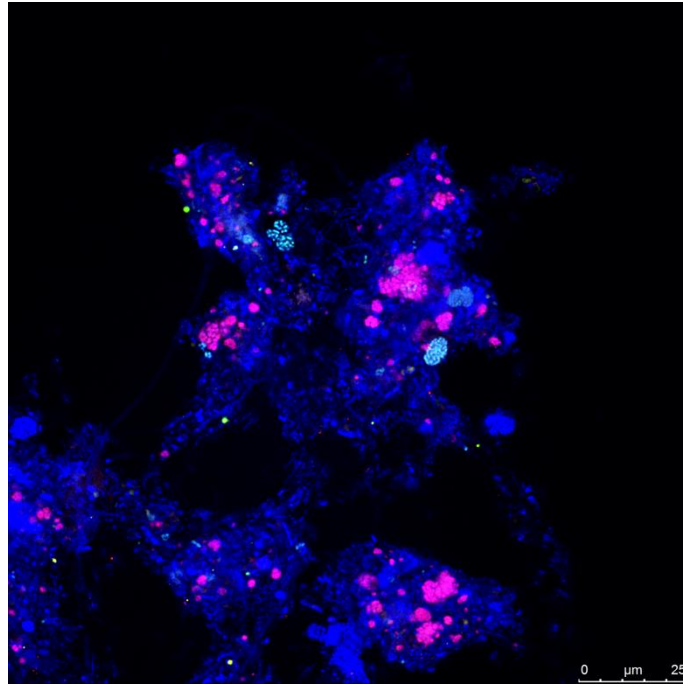

35

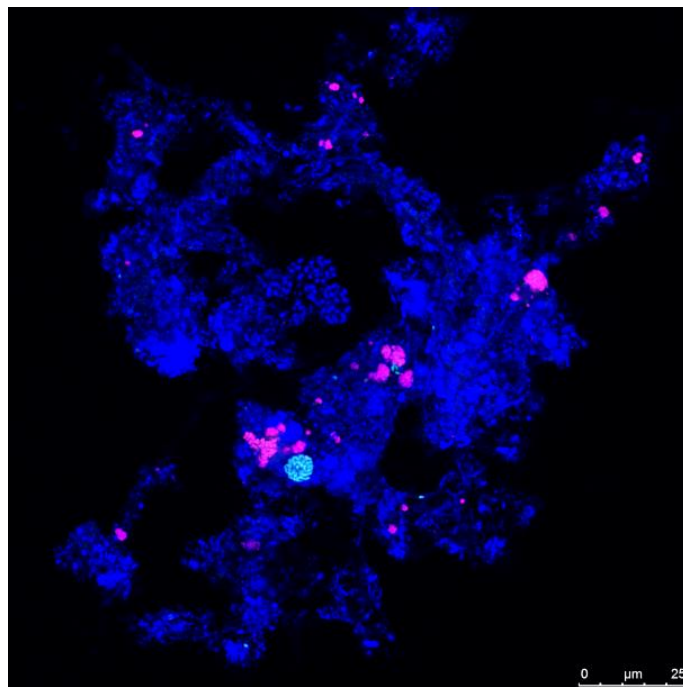

36



37

*Yuanlecun: W7*

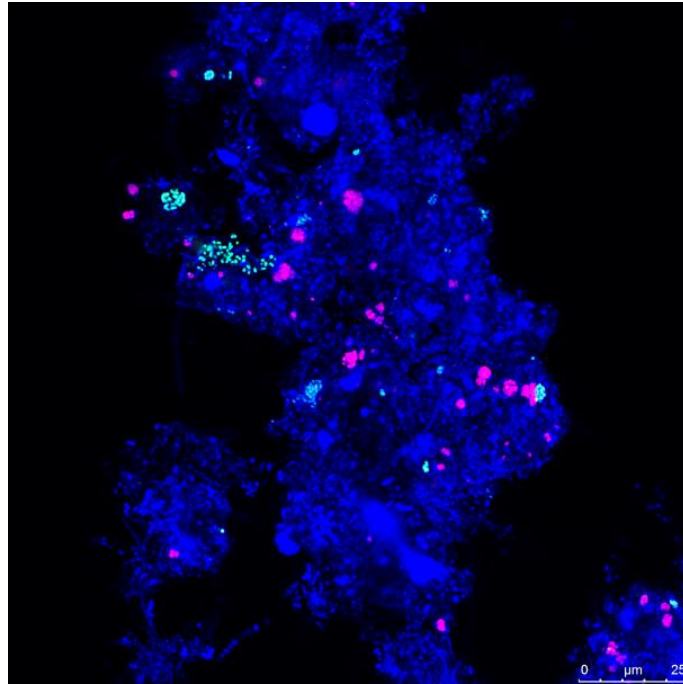

38

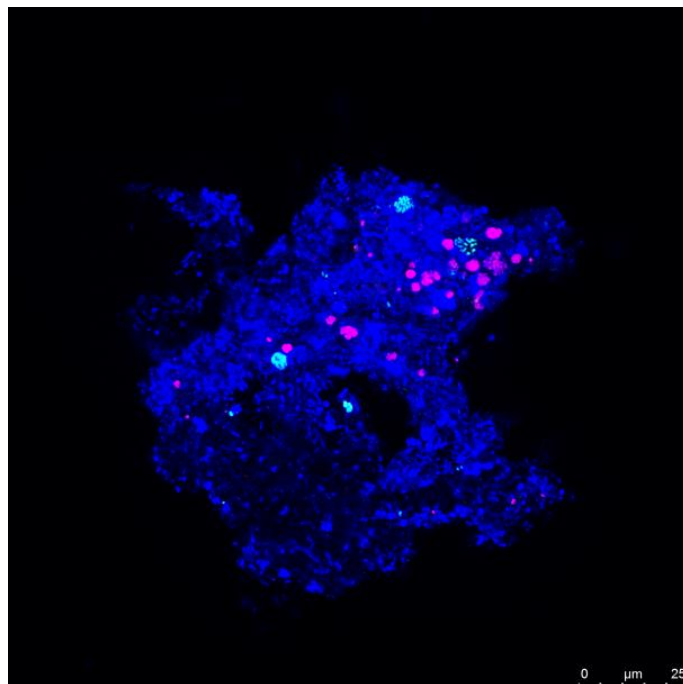

39



40

*Liucunbao: W8*

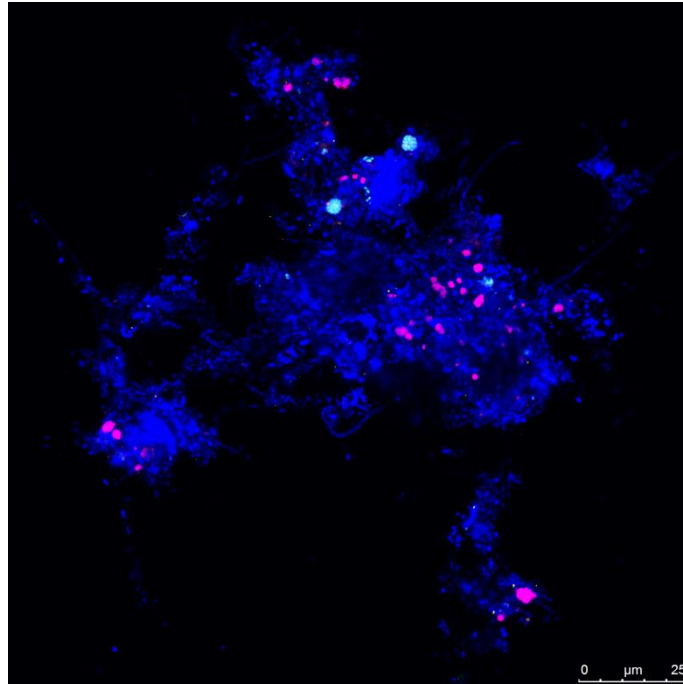

41

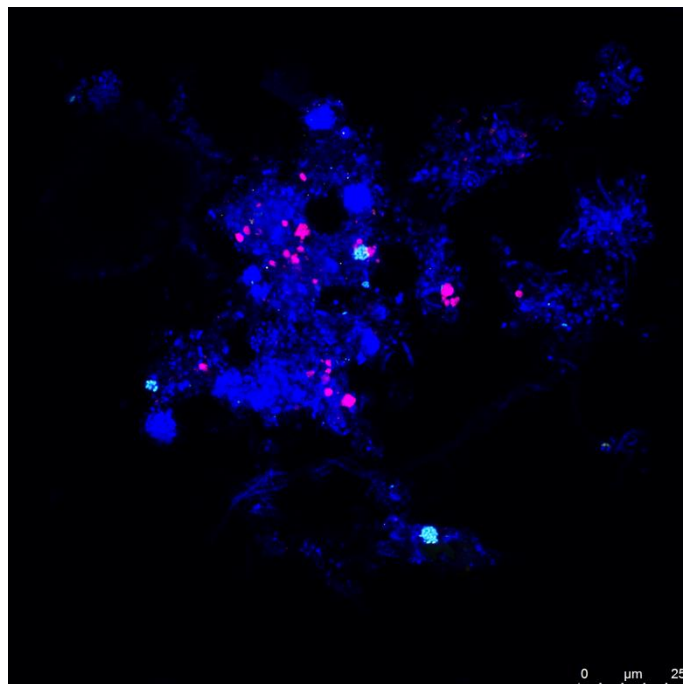

42

43

*Gaoxin: W9*

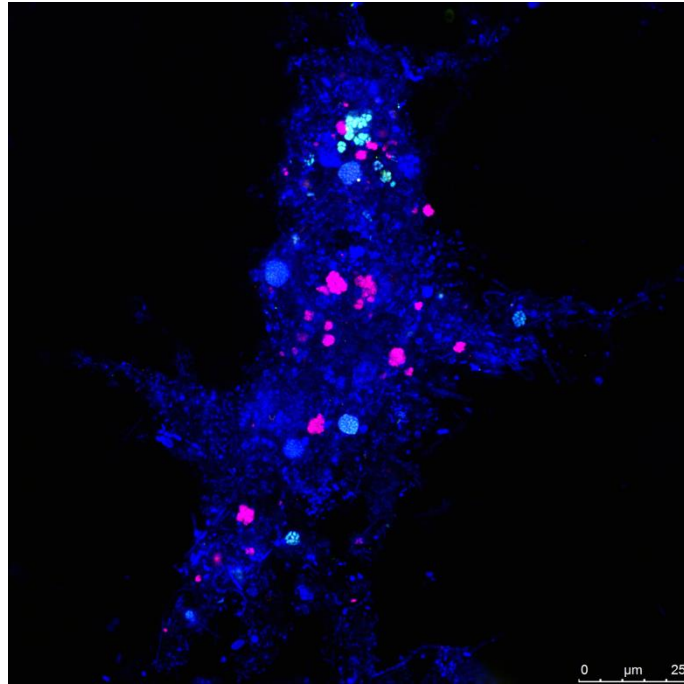

44

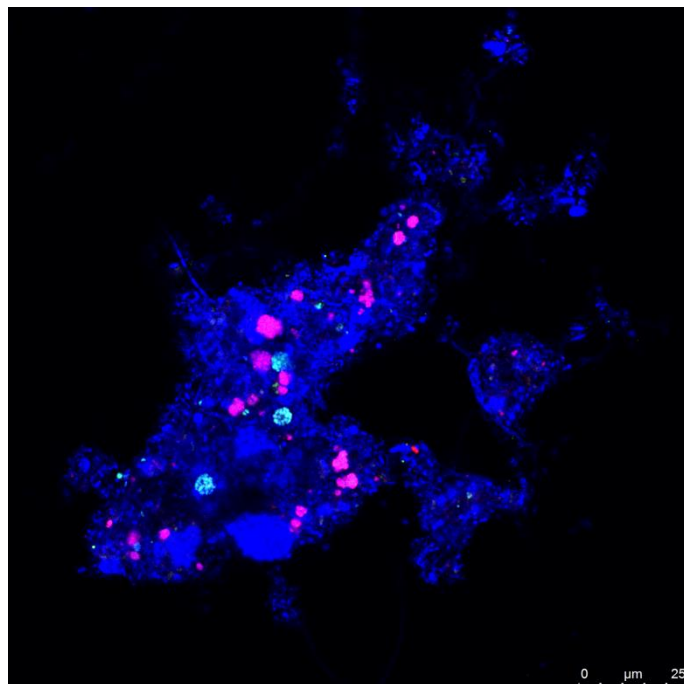

45

46

*Changan: W10*

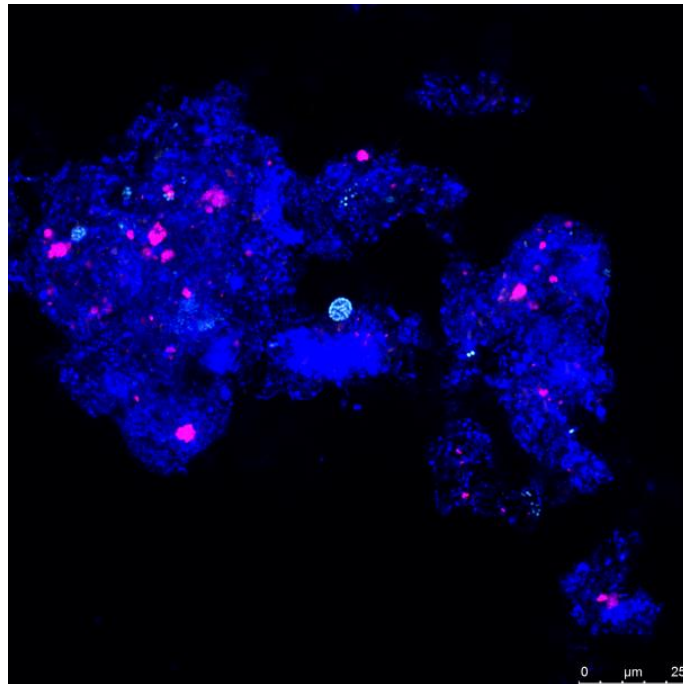

47

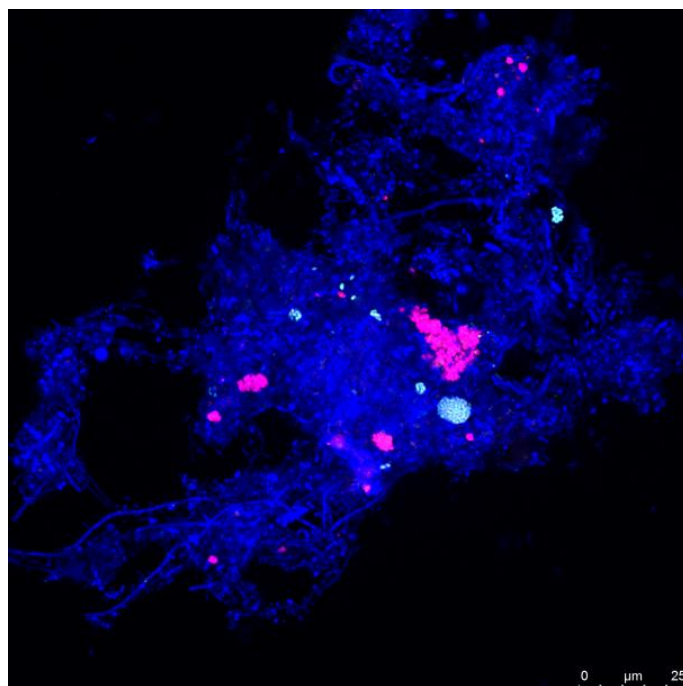

48

49

50 Figure S1. Community structure of nitrifying bacteria in 10 WWTPs In situ hybridization of activated sludge with  
51 Cy5-labeled probe EUBmix, Flous-labeled probe AOBmix and Cy3-labeled probe NOBmix. Blue:  
52 EUBmix-stained Eubacteria; cyan: AOBmix-stained AOB; carmine: NOBmix-stained NOB; Bar=25 $\mu$ m

53

*Dengjiacun: W1*

54

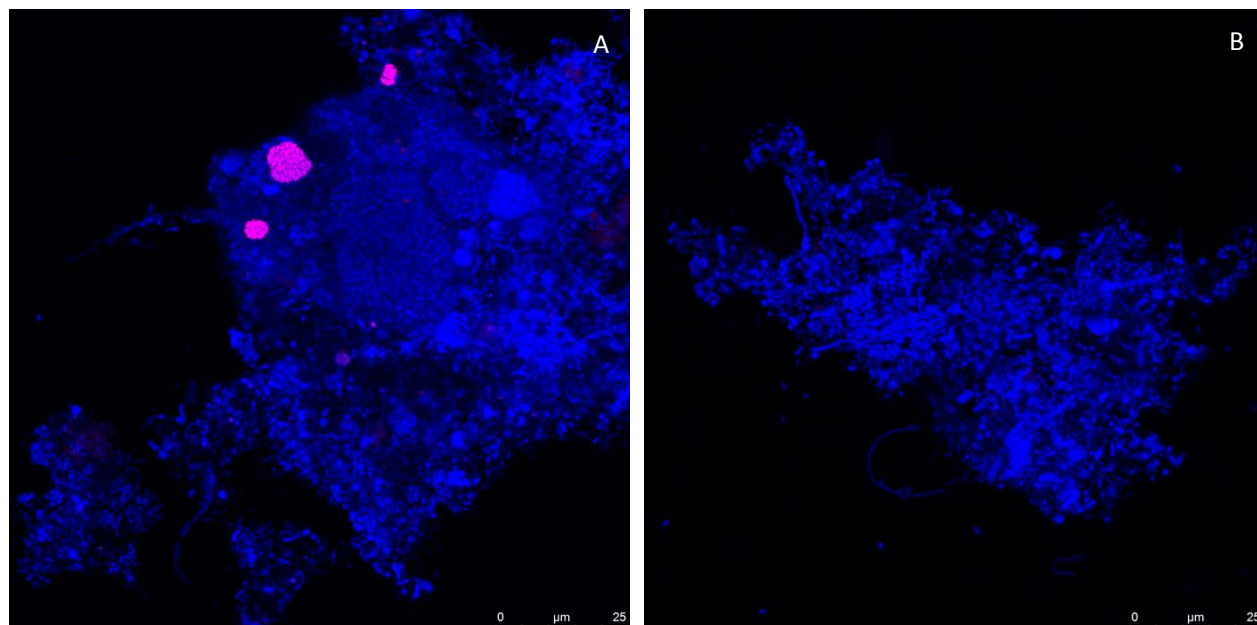

55

56

57

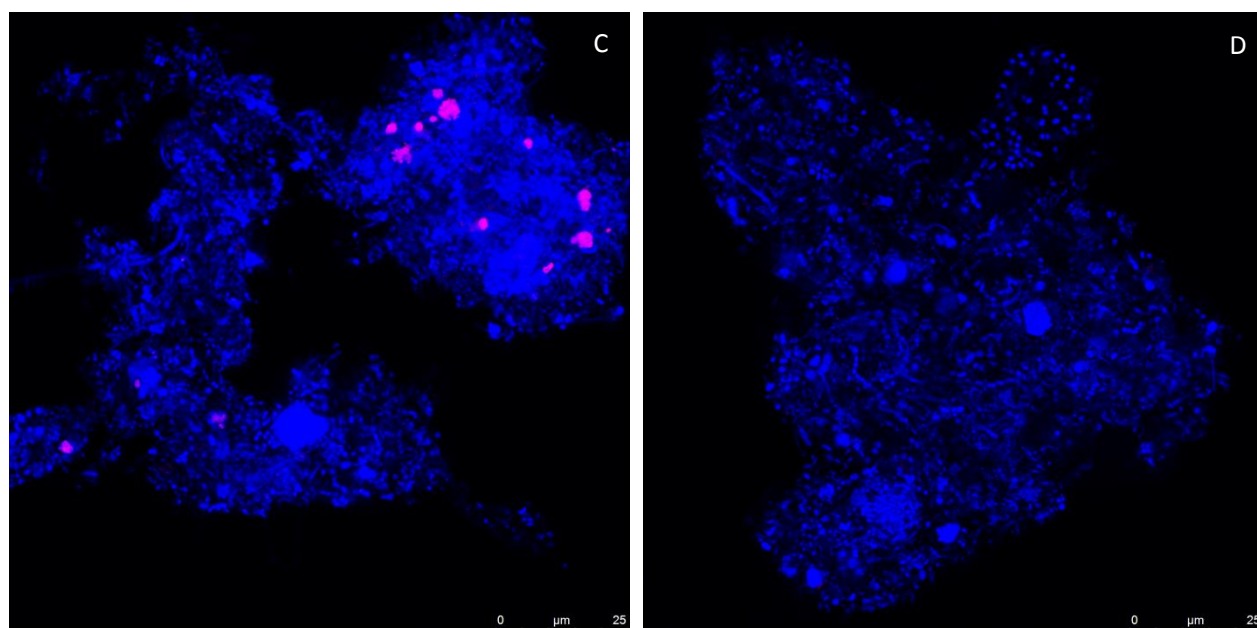

58

59

*Dengcun: W2*

60

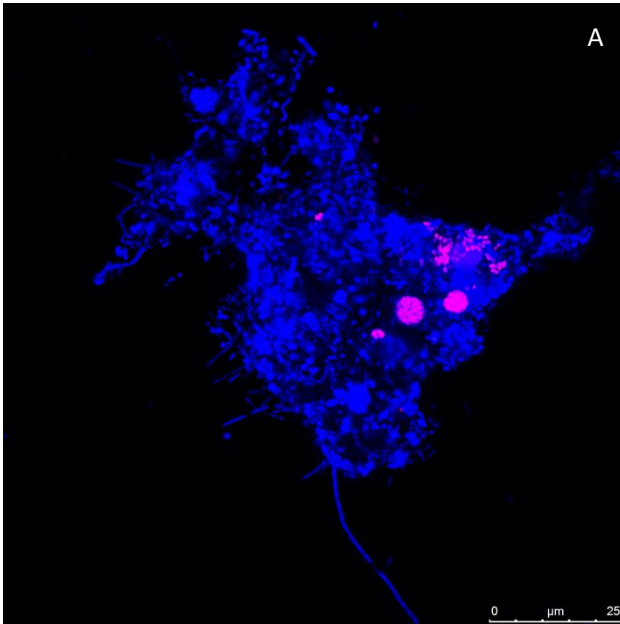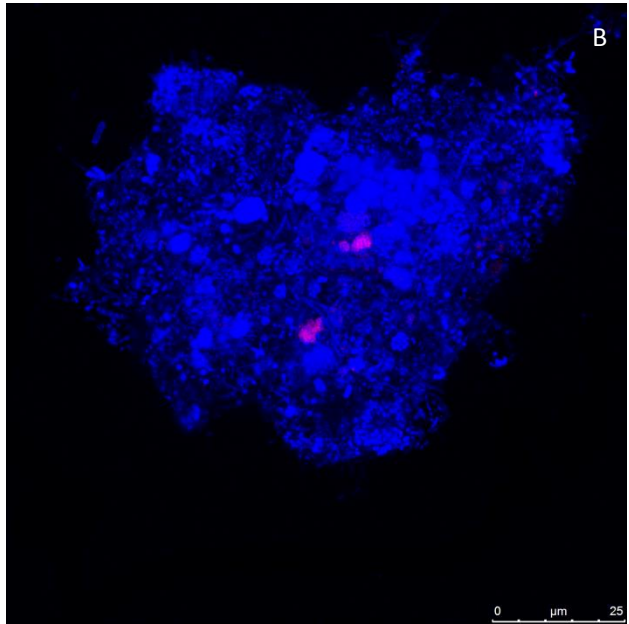

61

62

63

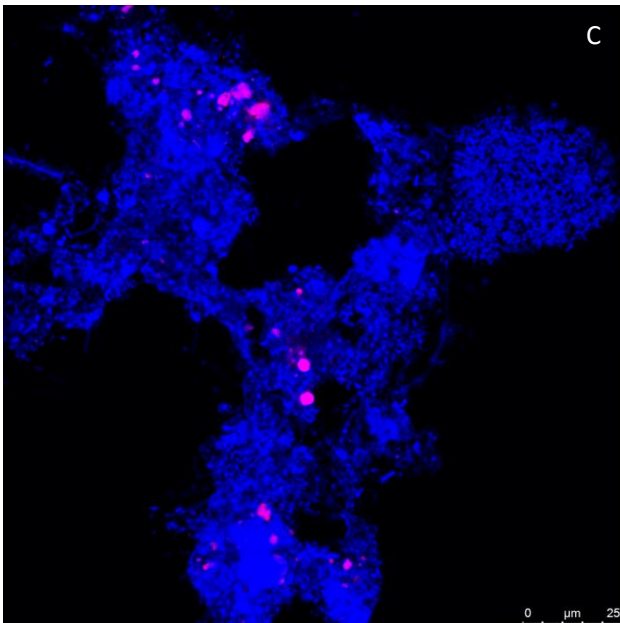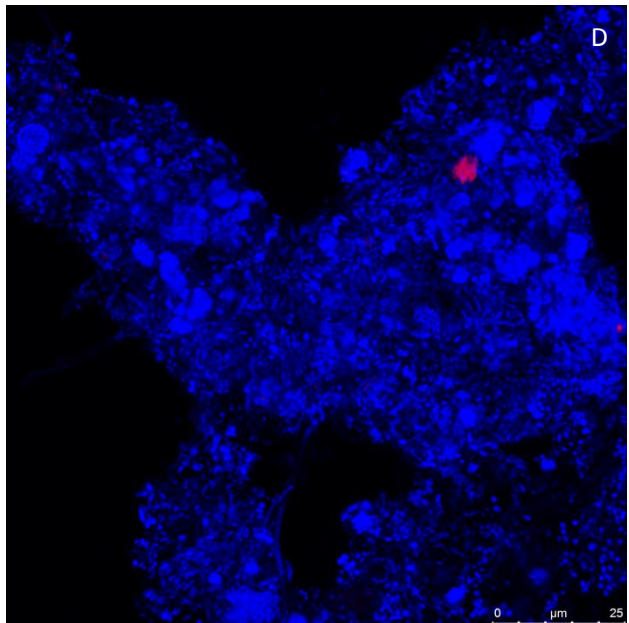

64



65

*Beishiqiao: W3*

66

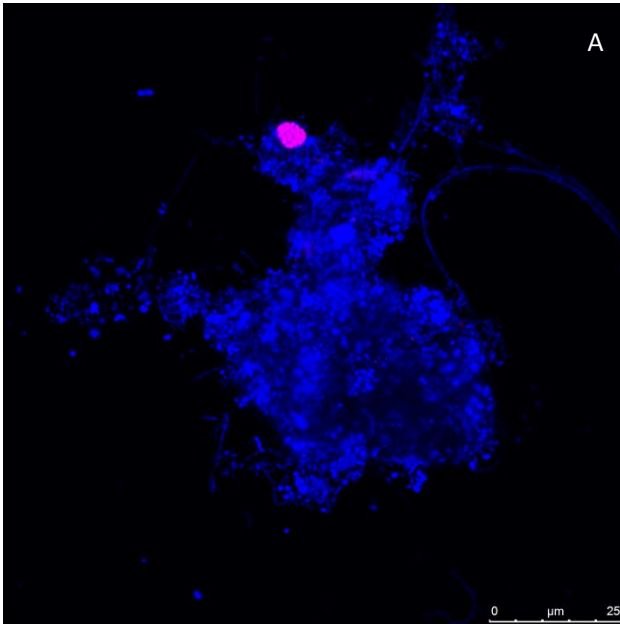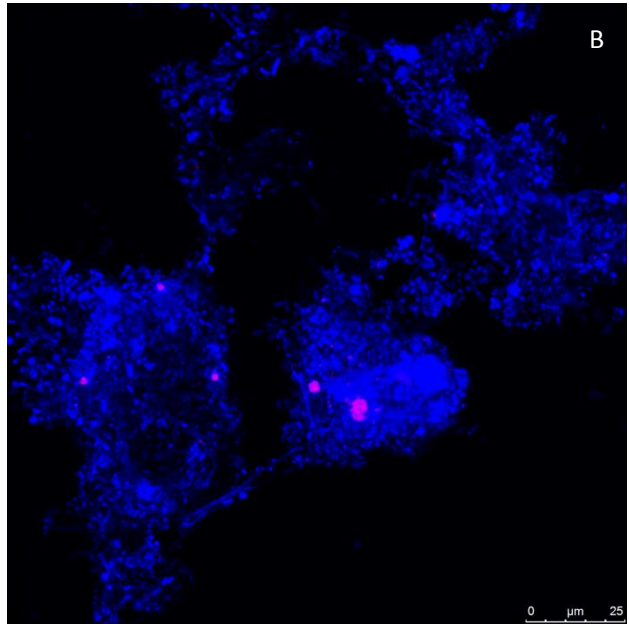

67

68

69

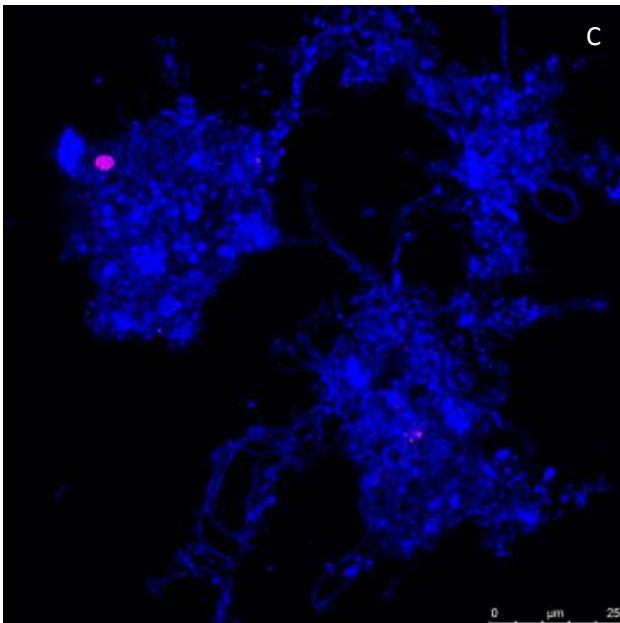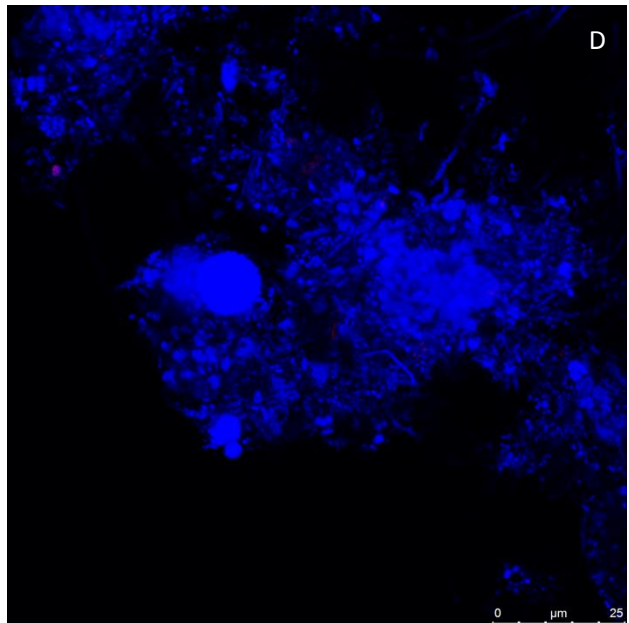

70

71

*Bshiq: W4*

72

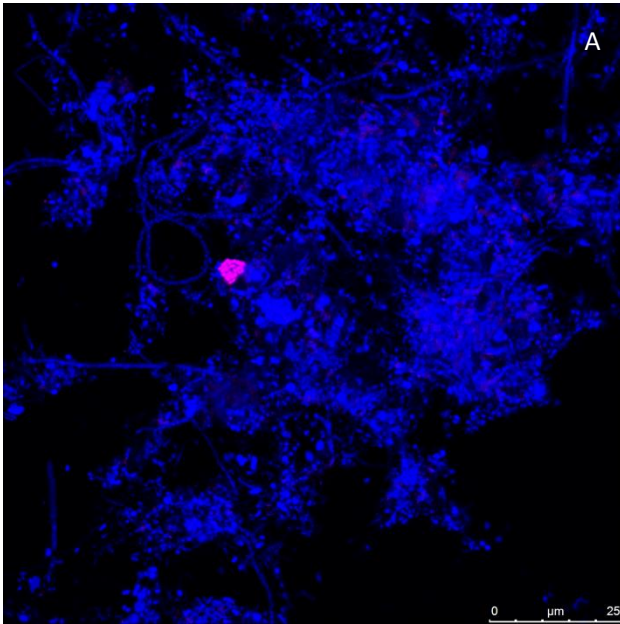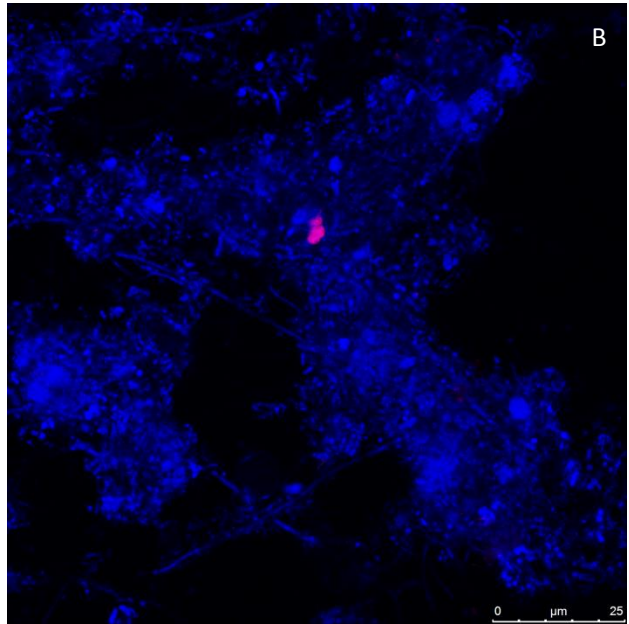

73

74

75

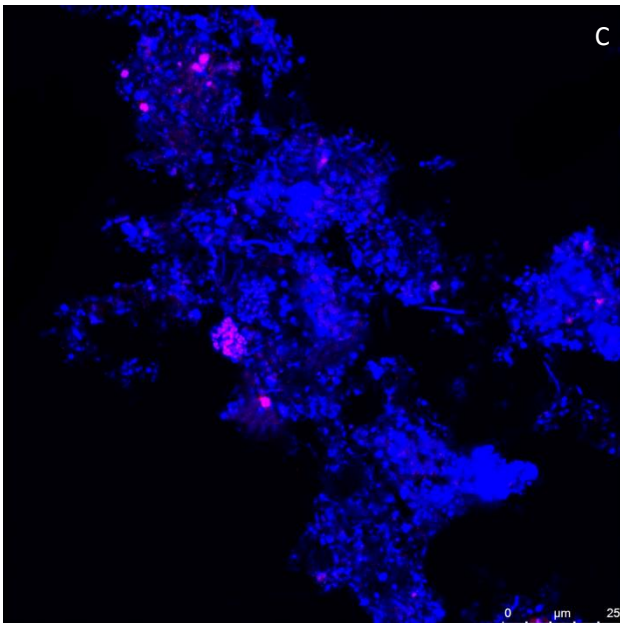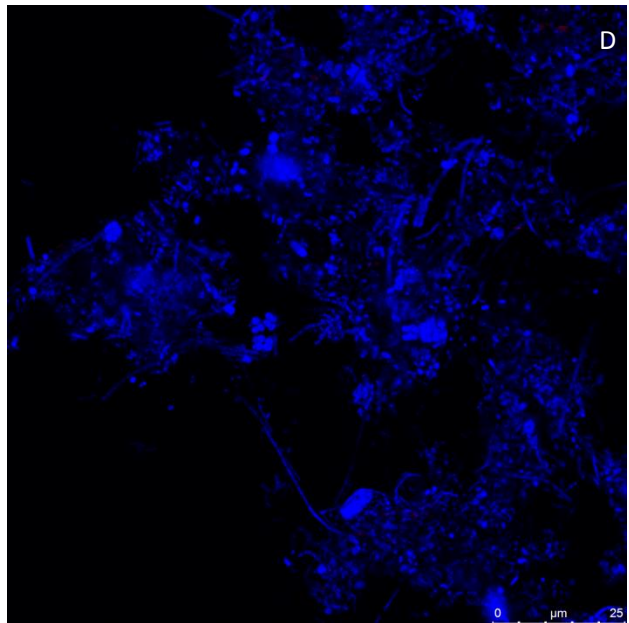

76



77

*Fangzhicheng: W5*

78

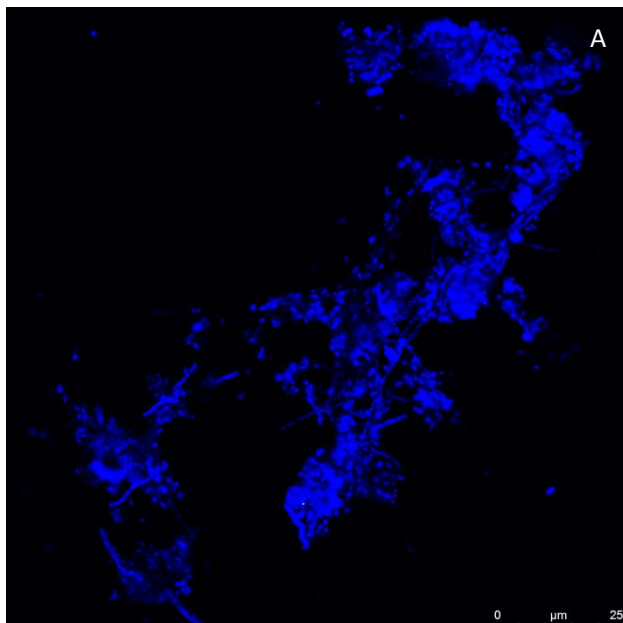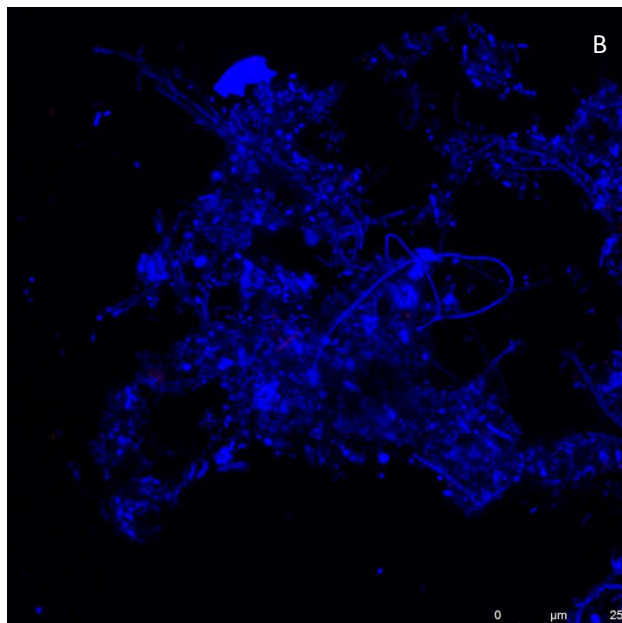

79

80

81

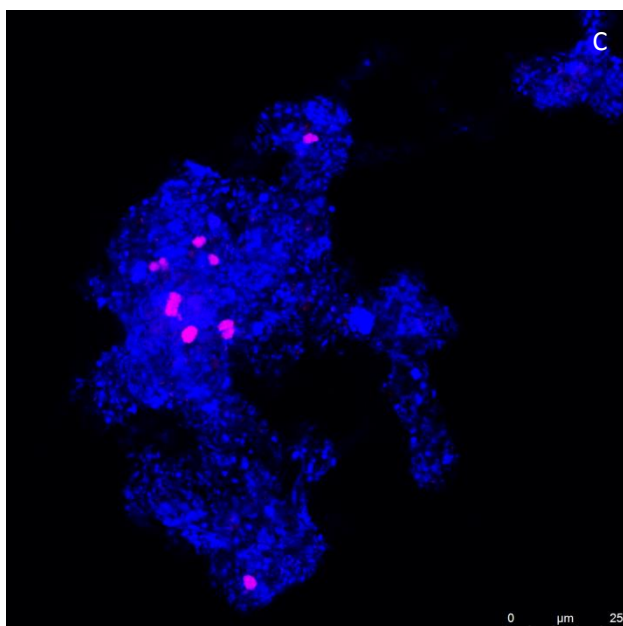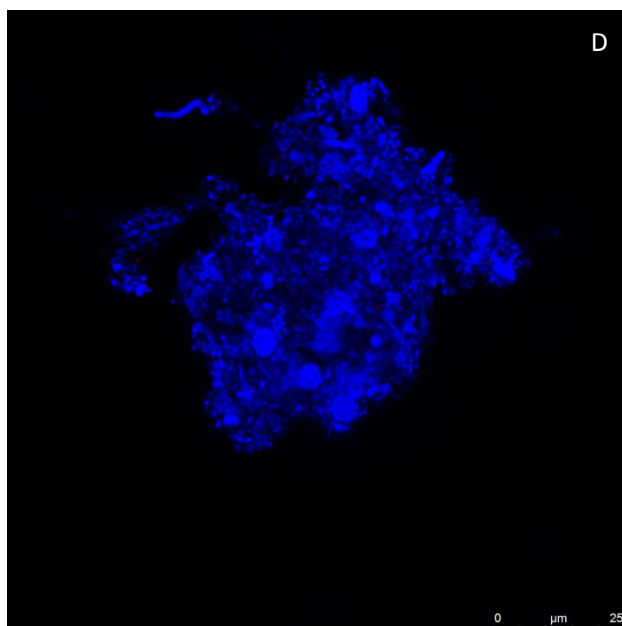

82

83

*Dianzicun: W6*

84

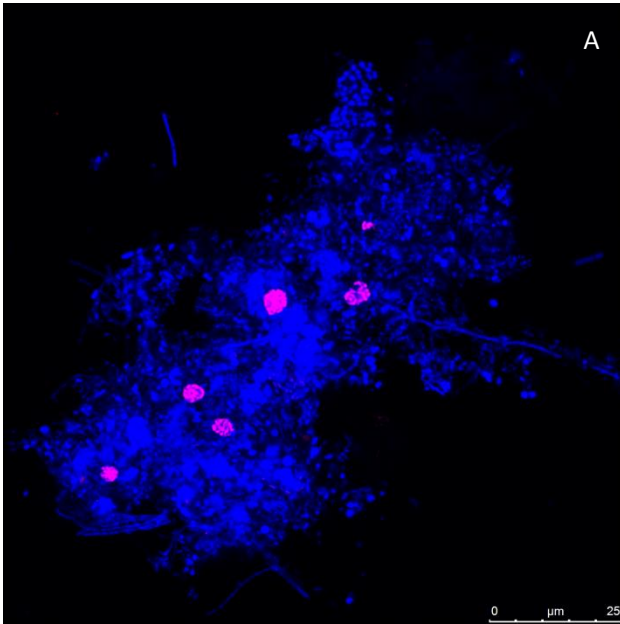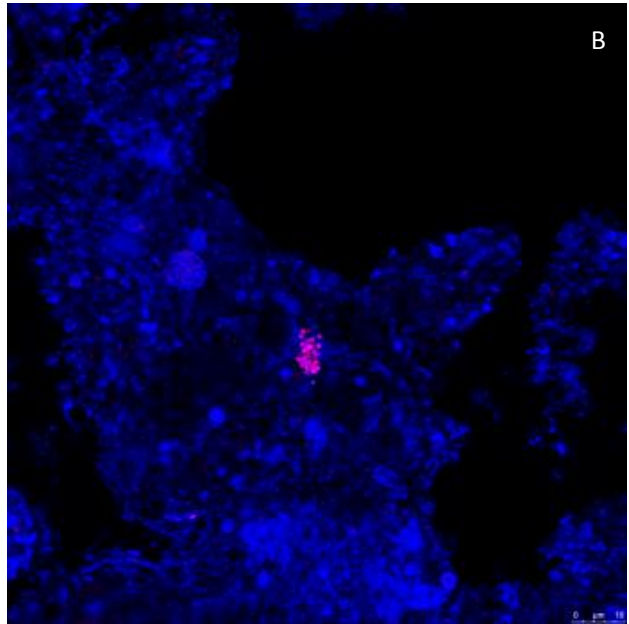

85

86

87

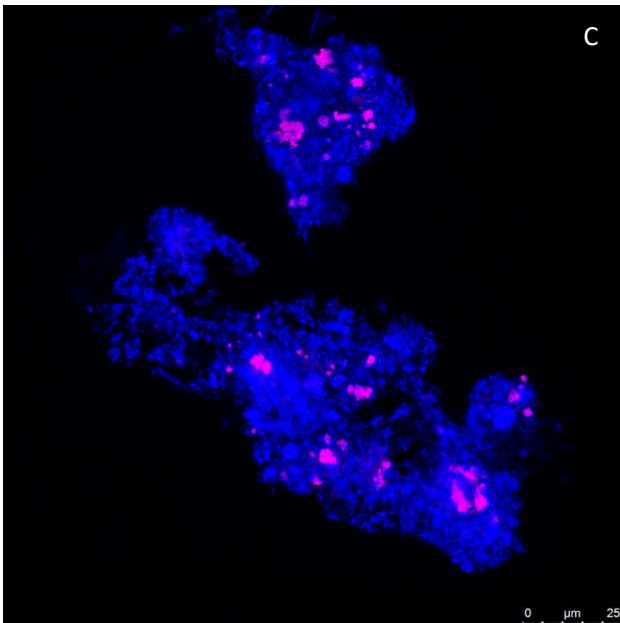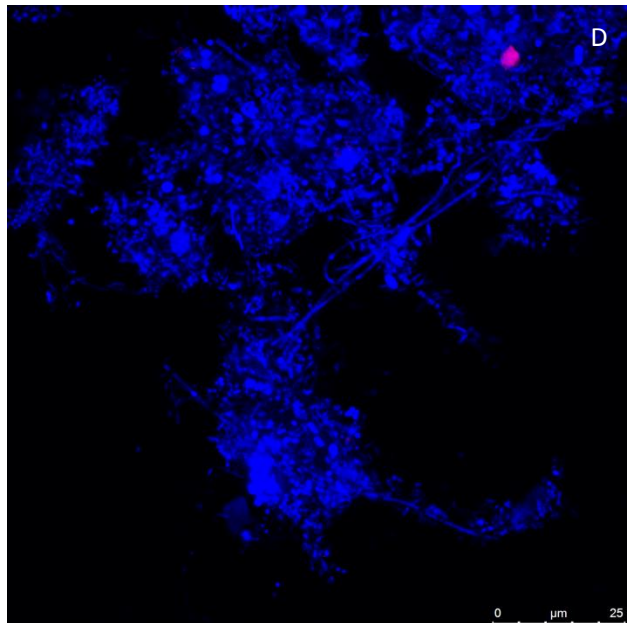

88

89

*Yuanlecun: W7*

90

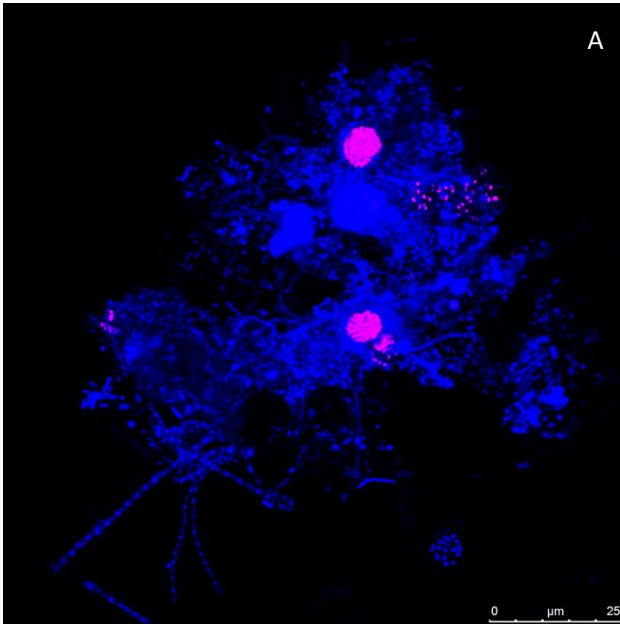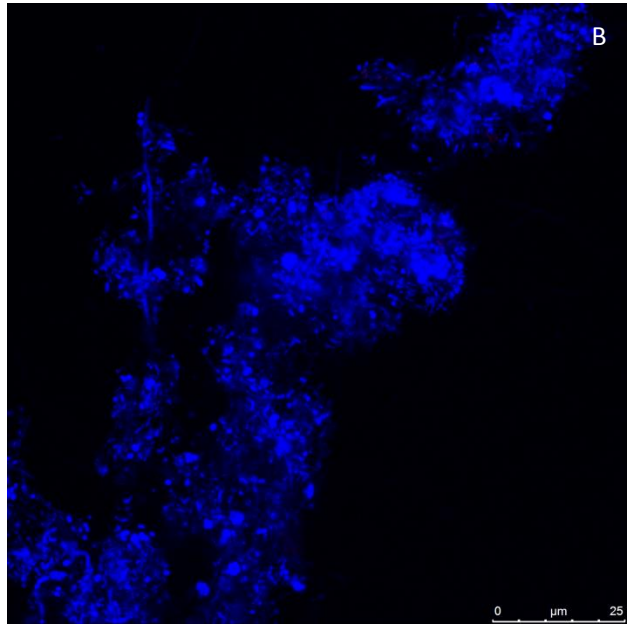

91

92

93

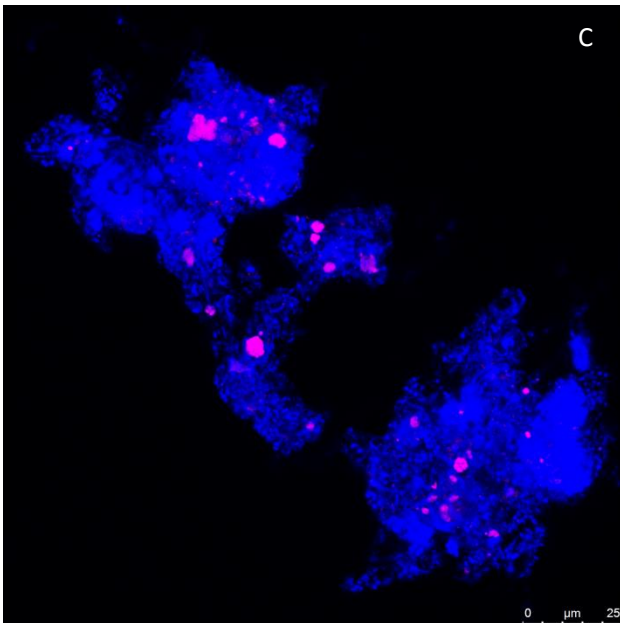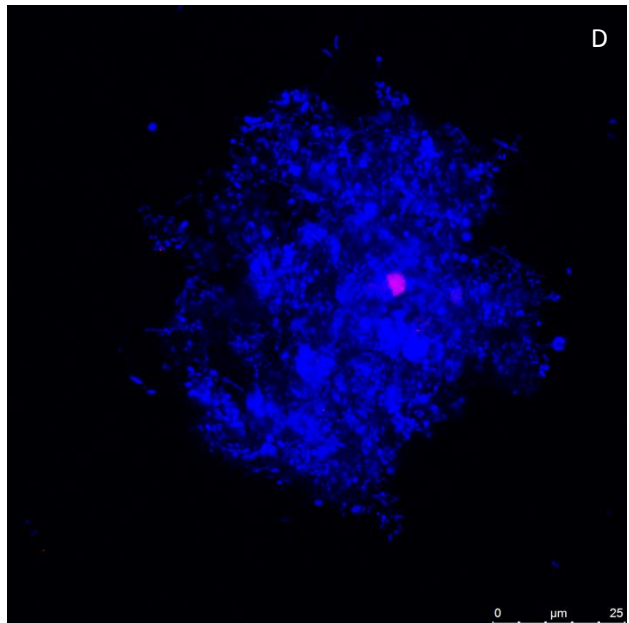

94

95

*Liucunbao: W8*

96

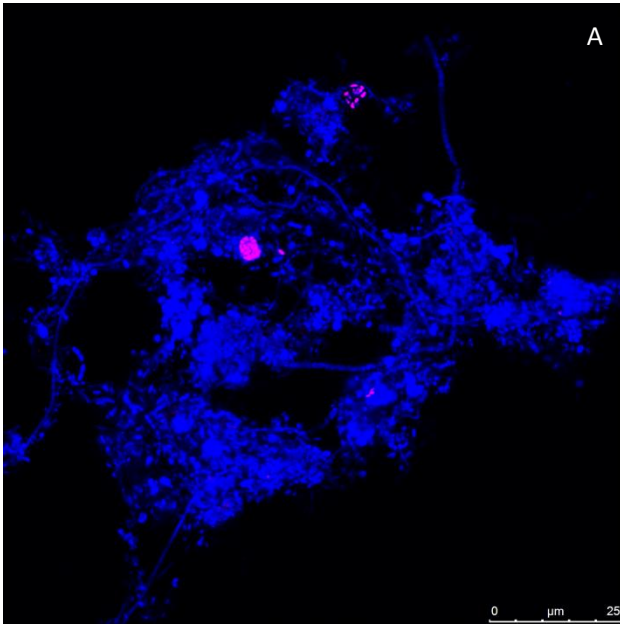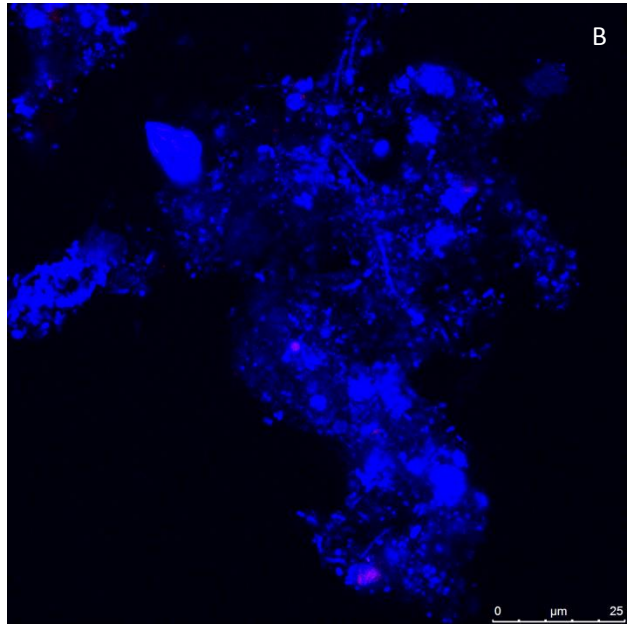

97

98

99

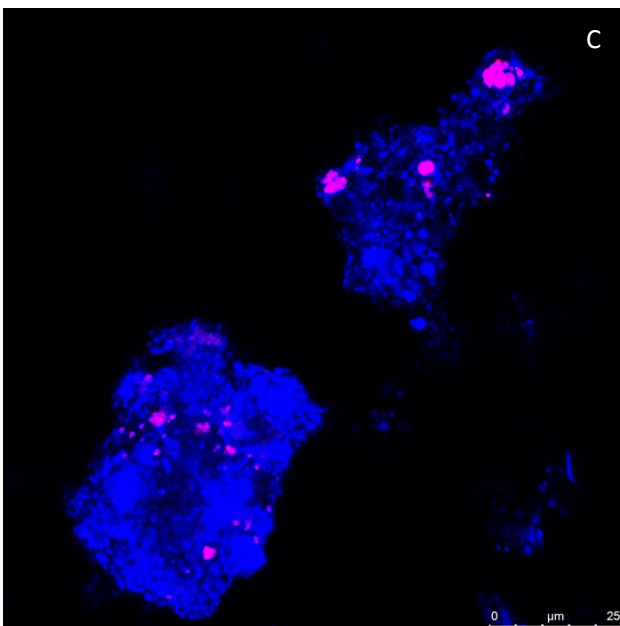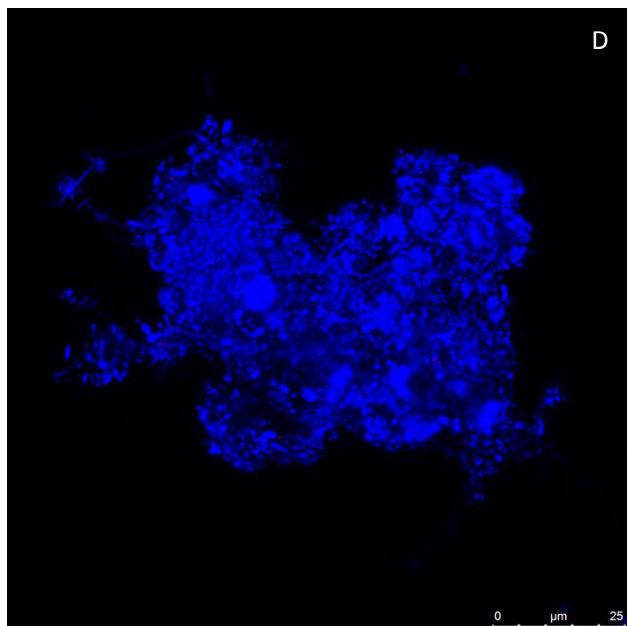

100



101

*Gaoxin: W9*

102

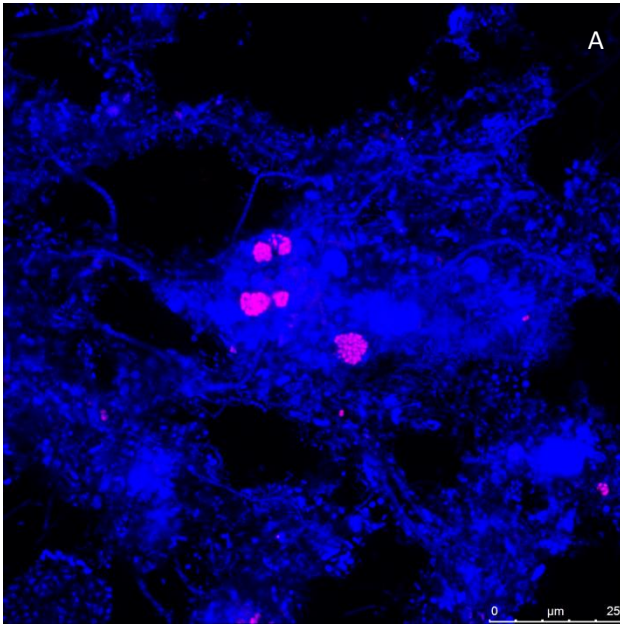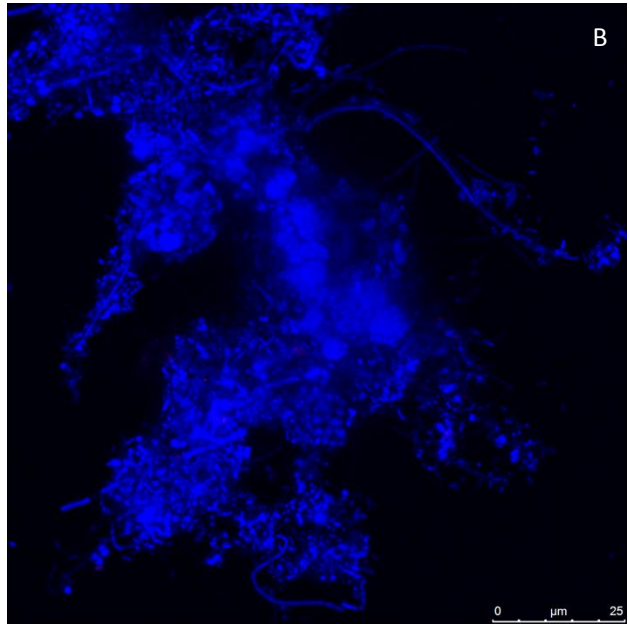

103

104

105

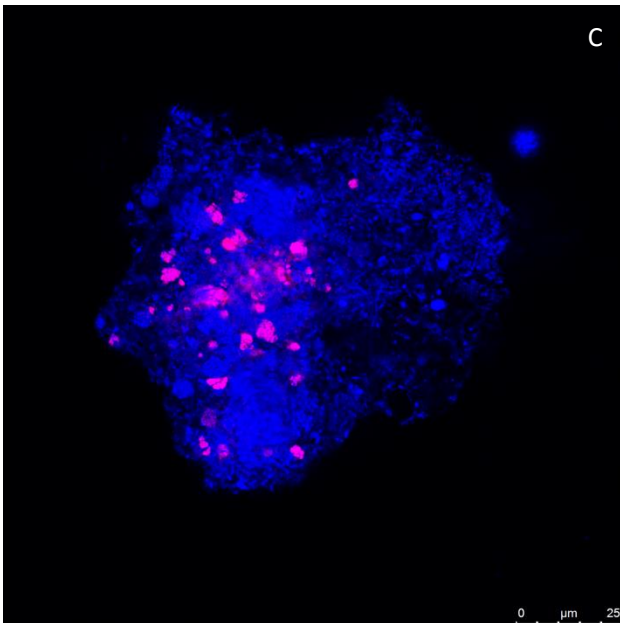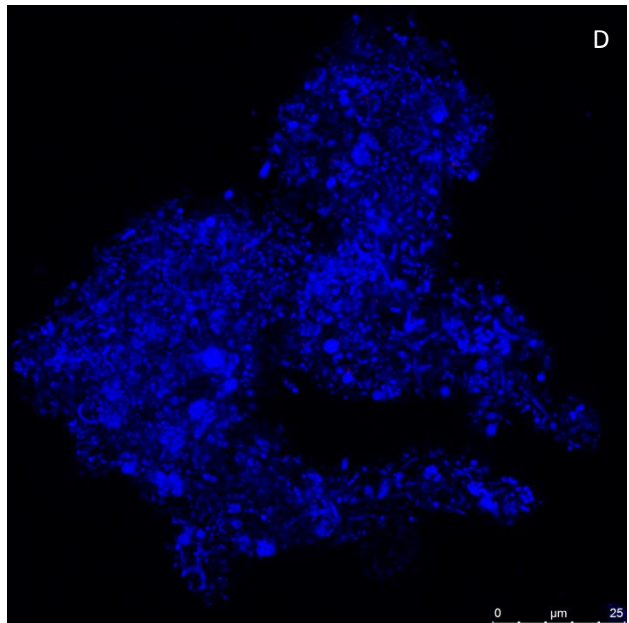

106

107

*Changan: W10*

108

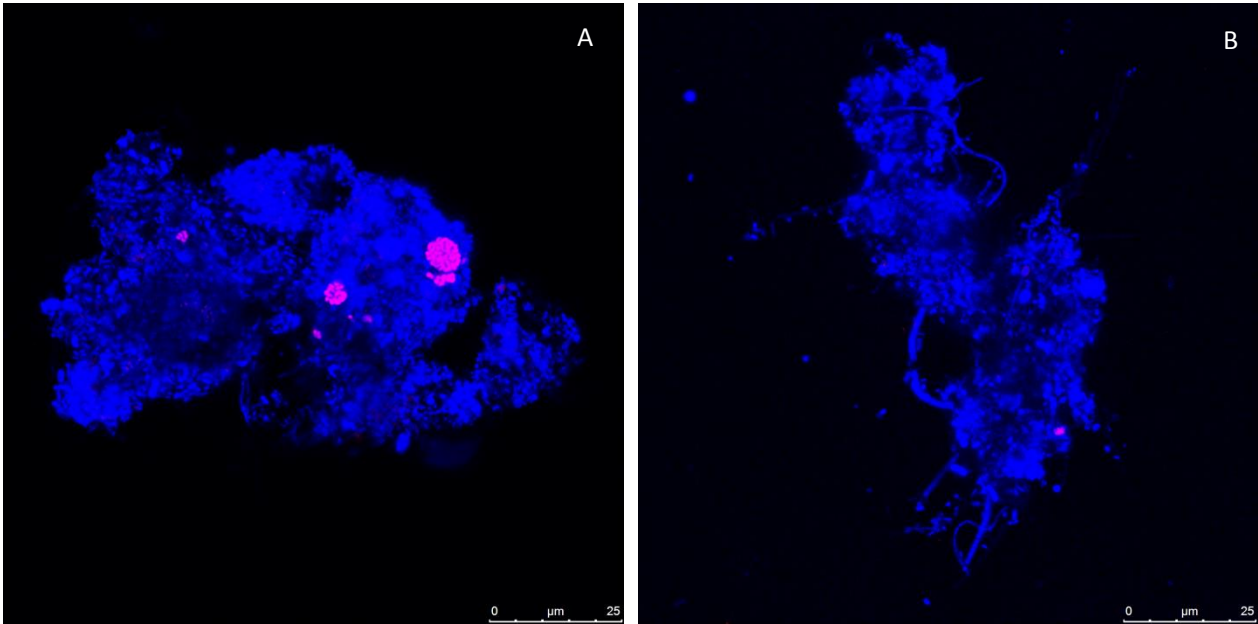

109

110

111

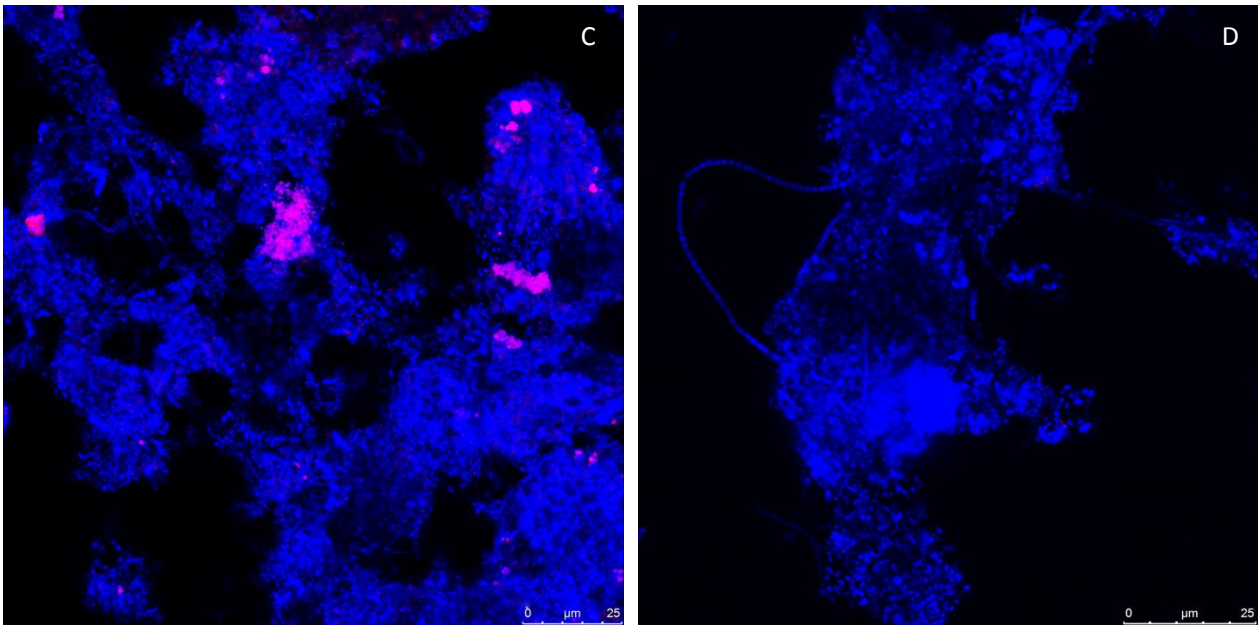

112

113

114 Figure S2. Four groups of nitrifying bacteria in activated sludge in 10 WWTPs. In suit hybridizations of activated  
115 sludge with Cy5-labeled probe EUBmix (Eubacteria), Cy3-labeled probe Nsm156 (Nitrosomonas)、Nsv443  
116 (Nitrosospira)、Ntspa662 (Nitrospira) and Nit3 (Nitrobacter). Blue: Eubacteria; carmine: Nitrosomonas (A)、  
117 Nitrosospira (B)、Nitrospira (C) and Nitrobacter (D). Bar=25  $\mu$  m.

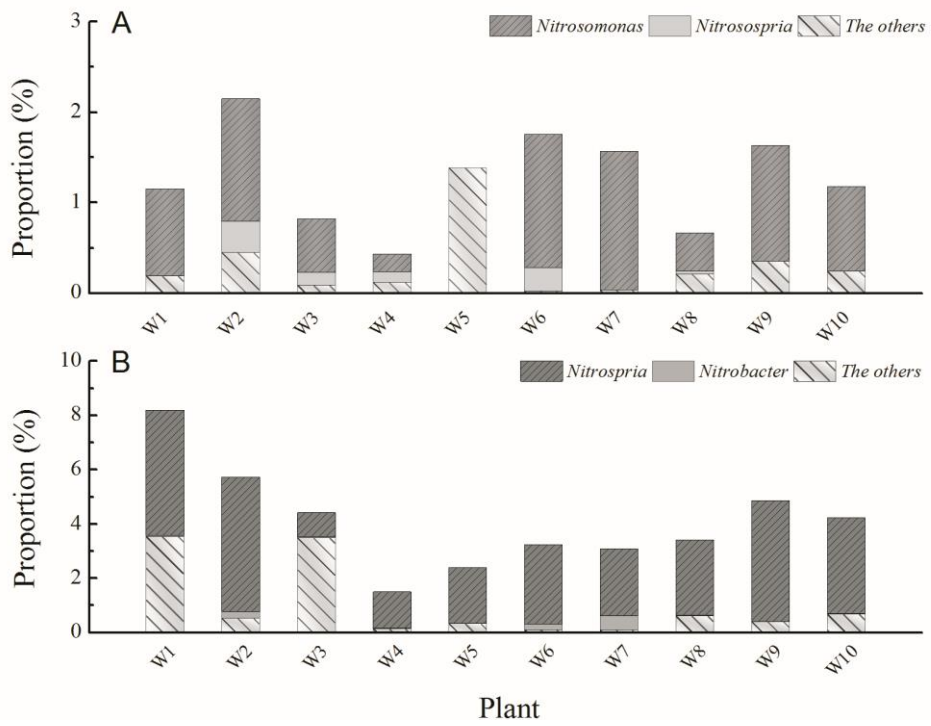

118  
119  
120

Figure S3. Community structure of nitrifying bacterial in 10 WWTPs (A: AOB; B: NOB).
